# Supplementary material for: Serum Afamin a Novel Marker of Increased Hepatic Lipid Content
Source: PubMed Central journal article supplement (PMC8481912; doi:10.3389/fendo.2021.670425), 2021-09-16
Supplement: DataSheet_1.pdf [file DataSheet_1.pdf]

*Supplementary Material*

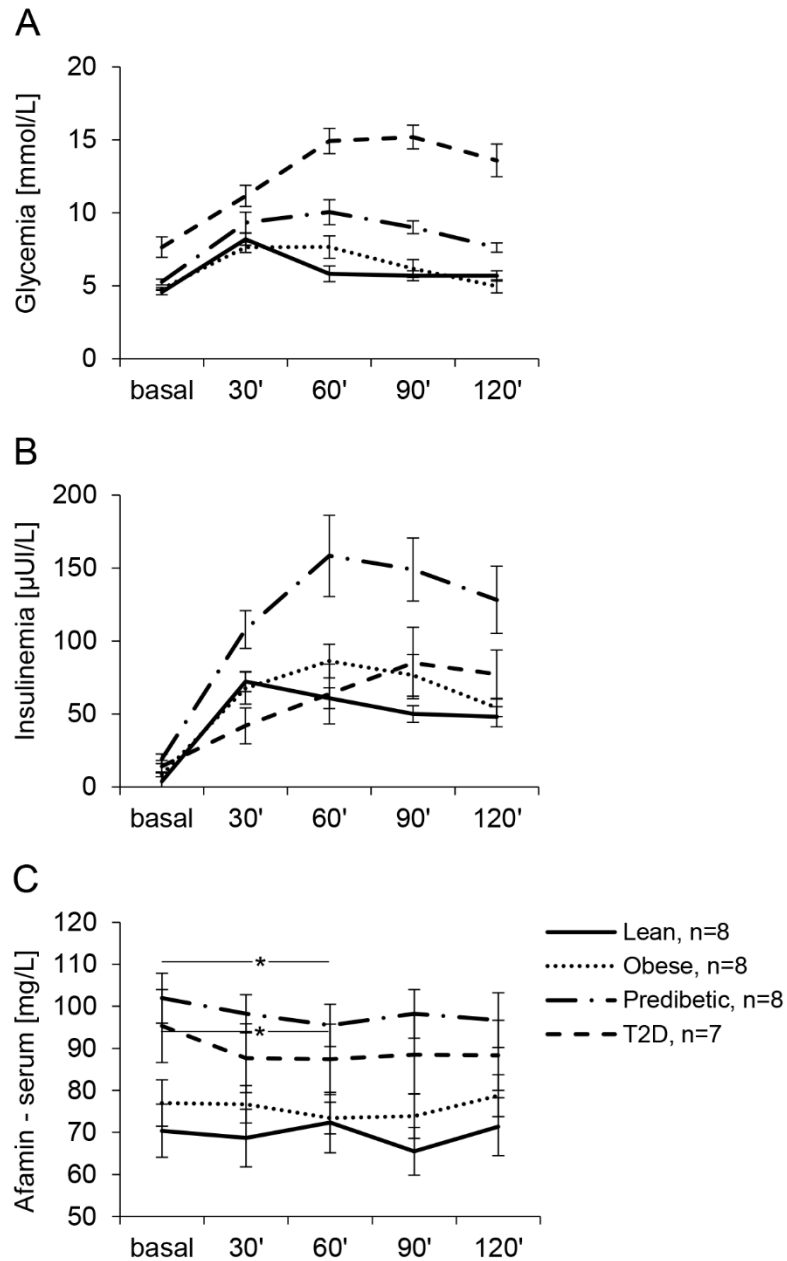

**Supplementary Figure 1.** (A) Glycemia, (B) insulinemia and (C) serum afamin concentrations during oGTT. Data are presented as mean  $\pm$  SEM. \*  $p < 0.05$ ; One-way repeated measures ANOVA (Turkey multiple comparison test).
